# Supplementary material for: Study on the quality and inkjet printing effect of the prepared washing-free disperse dye ink
Source: Royal Society of Chemistry journal article supplement (doi:10.1039/d3ra01597a), 2023-01-01
Supplement: d3ra01597a1.pdf [file d3ra01597a1.pdf]

**Table SI.** Formation process of ink droplets of different washing-free disperse dye ink.

| Ink sample | Driving waveform | The inkjet properties of washing-free disperse dye ink                               |
|------------|------------------|--------------------------------------------------------------------------------------|
| Ink a      | A                | 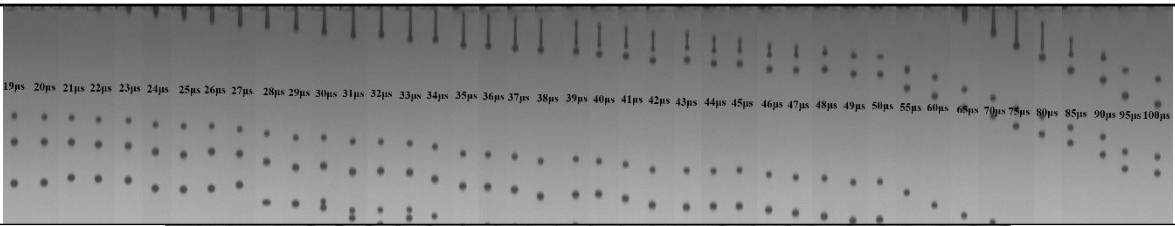   |
|            | B                |    |
|            | C                |   |
| Ink b      | A                |  |
|            | B                |  |
|            | C                |  |
| Ink c      | A                |  |

|       |   |  |
|-------|---|--|
|       | B |  |
|       | C |  |
| Ink d | A |  |
|       | B |  |
|       | C |  |
| Ink e | A |  |
|       | B |  |
|       | C |  |

|       |   |                                                                                      |
|-------|---|--------------------------------------------------------------------------------------|
| Ink f | A | 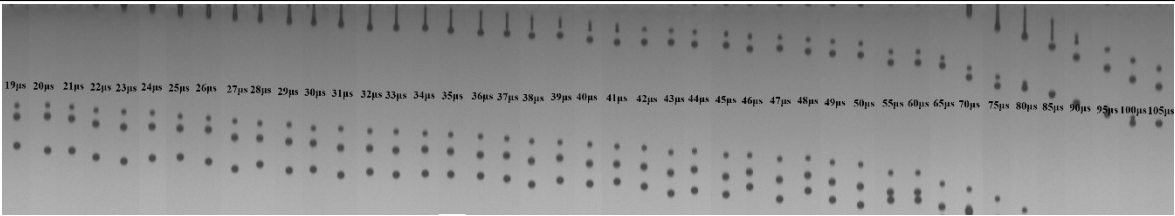   |
|       | B |    |
|       | C |   |
| Ink g | A |  |
|       | B |  |
|       | C |  |
